# Supplementary material for: Rangeland dynamics: investigating vegetation composition and structure of urban and exurban prairie dog habitat
Source: PeerJ. 2015 Jan 29;3:e736. doi: 10.7717/peerj.736 (PMC4314087; doi:10.7717/peerj.736)
Supplement: Data S1 — Spreadsheet providing raw data on functional group cover, peak season community and dominant species, vegetation quality and prairie dog counts. [file peerj-03-736-s001.xlsx]

## Sheet: Functional Group Cover
Site	Colony	Season	Transect	GGL % cover	asqtGGL	FRB % cover	asqtFRB	LTR % cover	asqtLTR	BG % cover	asqtBG	SHB % cover	asqtSHB
Exurban	off	early	1	39.8571	0.683261	9.57143	0.314538	47.1429	0.756811	2.28571	0.151768	1.14286	0.107109
Exurban	off	early	2	50.2857	0.788255	5.85714	0.244442	36.8571	0.652407	7	0.267763	0	0			Code	Functional Group
Exurban	off	early	3	43.1429	0.71661	14.5714	0.391662	40.2857	0.687634	2.14286	0.146913	0	0
Exurban	off	late	1	43.8571	0.723814	11	0.338065	36.8571	0.652407	1.85714	0.136702	7	0.267763			GGL	Grass and grass-likes
Exurban	off	late	2	50.1429	0.786827	4.85714	0.222214	42.2857	0.707946	4	0.201358	0	0			FRB	Forbs
Exurban	off	late	3	37	0.653887	17	0.424989	43.1429	0.71661	2.14286	0.146913	0	0			LTR	Litter
Exurban	off	psc	1	49.8571	0.78397	11.1429	0.340342	33.2857	0.614975	1	0.100167	5.28571	0.231982			BG	Bareground
Exurban	off	psc	2	46.5714	0.751086	8.57143	0.297123	39.5714	0.680341	6.85714	0.26495	0	0			SHB	Shrub
Exurban	off	psc	3	49.5714	0.781112	15	0.397699	33	0.61194	2.71429	0.165505	0	0
Exurban	on	early	1	30	0.57964	9.57143	0.314538	38.4286	0.668625	22.8571	0.49848	0	0
Exurban	on	early	2	14.5714	0.391662	27.5714	0.552815	42.5714	0.710836	15.2857	0.401685	0	0
Exurban	on	early	3	30	0.57964	17.2857	0.428779	16.7143	0.421173	35.1429	0.634549	0	0
Exurban	on	late	1	12.5714	0.362446	8.42857	0.294561	48.1429	0.766822	30.7143	0.587407	0	0
Exurban	on	late	2	3.57143	0.190126	26.2857	0.538322	54.2857	0.828308	18.4286	0.443701	0	0
Exurban	on	late	3	24.4286	0.516975	15.4286	0.403666	24.2857	0.515311	35.8571	0.642012	0	0
Exurban	on	psc	1	32	0.601264	12.8571	0.366734	38.7143	0.67156	17.7143	0.434419	0	0
Exurban	on	psc	2	22	0.488205	28.2857	0.560776	33.8571	0.621025	16.4286	0.417331	0	0
Exurban	on	psc	3	27.4286	0.551215	16	0.411517	18.5714	0.445541	28.1429	0.559188	0	0
Urban	off	early	1	37.1429	0.655366	2.85714	0.169846	20.5714	0.470753	30.2857	0.582753	8.57143	0.297123
Urban	off	early	2	13.2857	0.373091	3	0.174083	41.1429	0.696357	21.4286	0.481275	21.4286	0.481275
Urban	off	early	3	30.1429	0.581197	2.71429	0.165505	15.4286	0.403666	36.8571	0.652407	20.5714	0.470753
Urban	off	late	1	37.5714	0.659796	3.57143	0.190126	27	0.546401	21.5714	0.483014	10.8571	0.335776
Urban	off	late	2	8.42857	0.294561	8.85714	0.302188	46.5714	0.751086	11.8571	0.351538	24.4286	0.516975
Urban	off	late	3	36.1429	0.644989	4.42857	0.212027	15.7143	0.407606	28.4286	0.56236	15.4286	0.403666
Urban	off	psc	1	34.8571	0.631554	5.14286	0.228769	28	0.557599	23.7143	0.508621	10.1429	0.324124
Urban	off	psc	2	15.4286	0.403666	7.71429	0.281447	47.5714	0.761103	18.8571	0.449203	16.2857	0.4154
Urban	off	psc	3	33.4286	0.61649	4.42857	0.212027	24.5714	0.518636	29.4286	0.573388	12.8571	0.366734
Urban	on	early	1	0	0	53.5714	0.821143	5.57143	0.238287	41.8571	0.703605	0	0
Urban	on	early	2	0	0	35.5714	0.639031	5.57143	0.238287	59	0.875891	0	0
Urban	on	early	3	0	0	76	1.05882	8.28571	0.29198	15.7143	0.407606	0	0
Urban	on	late	1	0	0	16	0.411517	25.7143	0.531808	58.2857	0.868639	0	0
Urban	on	late	2	0	0	18.7143	0.447375	17	0.424989	64.2857	0.930274	0	0
Urban	on	late	3	0	0	32.8571	0.61042	33.4286	0.61649	33.4286	0.61649	0	0
Urban	on	psc	1	0	0	40.4286	0.689089	16.5714	0.419255	44.7143	0.732442	0	0
Urban	on	psc	2	0	0	29.2857	0.571819	9.71429	0.316958	59.2857	0.878798	0	0
Urban	on	psc	3	0	0	54	0.825441	15.7143	0.407606	28.7143	0.565523	0	0

## Sheet: Peak Season community & sp.
Community Composition
		Exurban on % cover	Exurban off % cover	Urban on % cover	Urban off % cover		Code	Group
Grasses	PNW-Grasses	0.142857	4.33333	0	2.04762		PNW	Perennial Native Warm season
	PNC-Grasses	23.0952	17.8571	0	25.2381		PNC	Perennial Native Cool season
	ANC-Grasses	0	0	0	0		ANC	Annual Native Cool season
	PIC-Grasses	0	30.9524	0	0.761905		PIC	Perennial Introduced Cool season
	AIC-Grasses	6.14286	0	0	0.190476		AIC	Annual Introduced Cool season
Forbs	PN-Forbs	8.52381	7.14286	6.33333	2.19048		PN	Perennial Native
	AN-Forbs	0.809524	0	13.3333	0.238095		AN	Annual Native
	BN-Forbs	0	0	0	4.14286		BN	Biennial Native
	PI-Forbs	10.1429	3.61905	26.8095	0.380952		PI	Pernnial Introduced
	AI-Forbs	0.380952	0.047619	1.52381	0.190476		AI	Annual Introduced
	BI-Forbs	0	0.190476	0	0		BI	Biennial Introduced
	Shrubs	0	1.7619	0	0
	Litter	30.381	34.9524	14	33.381
	Bare Ground	20.9048	3.57143	39.4762	24
Dominant Species
		Exurban on			Exurban off			Urban on			Urban off
	Elymus smithii	19.7143		Elymus smithii	15.9524		Convolvulus arvensis	26.9524		Elymus smithii	6.14286
	Bromus hordeaceus	6.09524		Bromus hordeaceus	10.0476		Chenopodium incanum	12		Hesperostipa comata	5.33333
	other grasses	2.85714		Poa pratensis	18.619		Dyssodia papposa	6.85714		Carex filifolia	17
	Convolvulus arvensis	3.04762		other grasses	11.8571		Other forbs	8.66667		other grasses	3.2381
	Linaria dalmatica	6.38095		Psoralidium tenuiflorum	2.19048		Litter	14		Eriogonum annum	4.28571
	other forbs	10.5238		other forbs	9.80952		Bare Ground	39.4286		other forbs	3.2381
	Litter	29.9048		Litter	35.2381					Artemisia dracunulus	11.6667
	Bare Ground	20.9524		Bare Ground	3.52381					other shrubs	1.7619
										Litter	33.381
										Bare Ground	24

## Sheet: Biomass & vegetation quality
Cage Number	Site	Biomass (grams)	Relative Feed Value	Protein	Neuteral Detergent Fibre	Acid Detergent Fibre	Digestible Nutrients
1	Exurban	21.735	140	9.6	42.5	32	66.9
2	Exurban	36.735	140	16	42.2	32.5	66
3	Exurban	35.665	103	9	50.9	41.7	56.1
1	Urban	45.435	121	9.2	50.4	29.7	69.6
2	Urban	22.195	88	7.2	62.6	38	59.7
3	Urban	7.825	104	9.4	55.7	34.5	64.2

## Sheet: Prairie dog count
						Prairie dog colony counts
Exurban		10 minutes Interval for 1.5 hours
Date	Start Time	1	2	3	4	5	6	7	8	9	10
2013-08-13	1904-01-01 09:30:00	5	5	4	7	11	8	3	4	9	9
2013-08-14	1904-01-01 07:30:00	8	11	9	6	6	9	11	11	9	11
2013-08-17	1904-01-01 07:20:00	6	15	13	21	18	17	10	14	10	13
2013-08-28	1904-01-01 07:00:00	13	13	9	14	11	12	9	8	12	10
2013-09-03	1904-01-01 07:00:00	7	14	12	9	9	6	11	11	12	6
Urban
Date	Start Time	1	2	3	4	5	6	7	8	9	10
2013-08-15	1904-01-01 09:00:00	16	10	16	23	17	19	12	14	13	11
2013-08-16	1904-01-01 07:10:00	18	14	16	6	12	12	10	10	7	10
2013-08-18	1904-01-01 08:10:00	7	4	5	5	3	6	22	19	17	10
2013-08-30	1904-01-01 08:35:00	14	14	10	25	9	4	7	5	8	7
2013-08-31	1904-01-01 07:30:00	5	7	2	4	4	5	6	5	6	4
